# Supplementary material
Source: publisher figshare collection journal article supplement (https://gsajournals.figshare.com/ndownloader/files/17683562)
Supplement: Supplementary file 1 [file 17683562]

**Supplemental Data - one Table and two Figures**

| Table S1. Wing phenotypes of MS1096.GAL4 x UAS <i>dCORL</i> , <i>mCORL1</i> and <i>mCORL2</i> . |                               |              |      |             |      |
|-------------------------------------------------------------------------------------------------|-------------------------------|--------------|------|-------------|------|
|                                                                                                 | Phenotype                     | # phenotype  |      | % phenotype |      |
| UAS <i>dCORL</i>                                                                                | PCV missing/truncated         | 62           |      | 100%        |      |
| Total Female Wings                                                                              | L1 vein ectopic hair          | 42           |      | 68%         |      |
| 62                                                                                              | L2 vein ectopic hair          | 4            |      | 6%          |      |
|                                                                                                 | L3 vein ectopic hair          | 6            |      | 10%         |      |
|                                                                                                 | L5 vein ectopic hair          | 33           |      | 53%         |      |
|                                                                                                 | L2 vein truncated/interrupted | 3            |      | 5%          |      |
|                                                                                                 | L5 vein truncated/interrupted | 13           |      | 21%         |      |
|                                                                                                 |                               |              |      |             |      |
| UAS <i>mCORL1</i>                                                                               |                               | Inserted III |      | Inserted II |      |
| Total Female Wings                                                                              |                               | #            | %    | #           | %    |
| III = 90                                                                                        | Small wing                    | 90           | 100% | 80          | 100% |
| II = 80                                                                                         | ACV missing/truncated         | 46           | 51%  | 28          | 35%  |
| 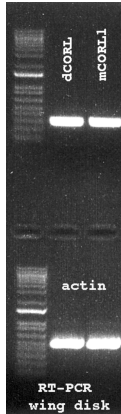              | PCV missing/truncated         | 63           | 70%  | 48          | 60%  |
|                                                                                                 | L1 vein ectopic hair L1       | 6            | 7%   | 0           | 0%   |
|                                                                                                 | L1 vein truncated/interrupted | 21           | 23%  | 1           | 1%   |
|                                                                                                 | L2 vein truncated/interrupted | 11           | 12%  | 65          | 81%  |
|                                                                                                 | L3 vein truncated/interrupted | 3            | 3%   | 1           | 1%   |
|                                                                                                 | L4 vein truncated/interrupted | 0            | 0%   | 22          | 28%  |
|                                                                                                 | L5 vein truncated/interrupted | 90           | 100% | 80          | 100% |
|                                                                                                 | L2 vein ectopic tissue        | 36           | 40%  | 1           | 1%   |
|                                                                                                 | L3 vein ectopic tissue        | 1            | 1%   | 0           | 0%   |
|                                                                                                 |                               |              |      |             |      |
|                                                                                                 |                               |              |      |             |      |
| UAS <i>mCORL2</i>                                                                               |                               | Inserted X   |      | Inserted II |      |
| Total Female Wings                                                                              |                               | #            | %    | #           | %    |
| X = 60                                                                                          | ACV missing/truncated         | 43           | 72%  | 75          | 80%  |
| II = 94                                                                                         | PCV missing/ truncated        | 41           | 68%  | 54          | 57%  |
|                                                                                                 | L1 vein ectopic hair          | 13           | 22%  | 13          | 14%  |
|                                                                                                 | L3 vein ectopic hair          | 0            | 0%   | 1           | 1%   |
|                                                                                                 | L1 vein truncated/interrupted | 59           | 98%  | 70          | 74%  |
|                                                                                                 | L2 vein truncated/interrupted | 12           | 20%  | 44          | 47%  |
|                                                                                                 | L4 vein truncated/interrupted | 1            | 2%   | 62          | 66%  |
|                                                                                                 | L5 vein truncated/interrupted | 60           | 100% | 94          | 100% |
|                                                                                                 | L1 vein ectopic tissue        | 60           | 100% | 94          | 100% |
|                                                                                                 | L2 vein ectopic tissue        | 8            | 13%  | 38          | 40%  |

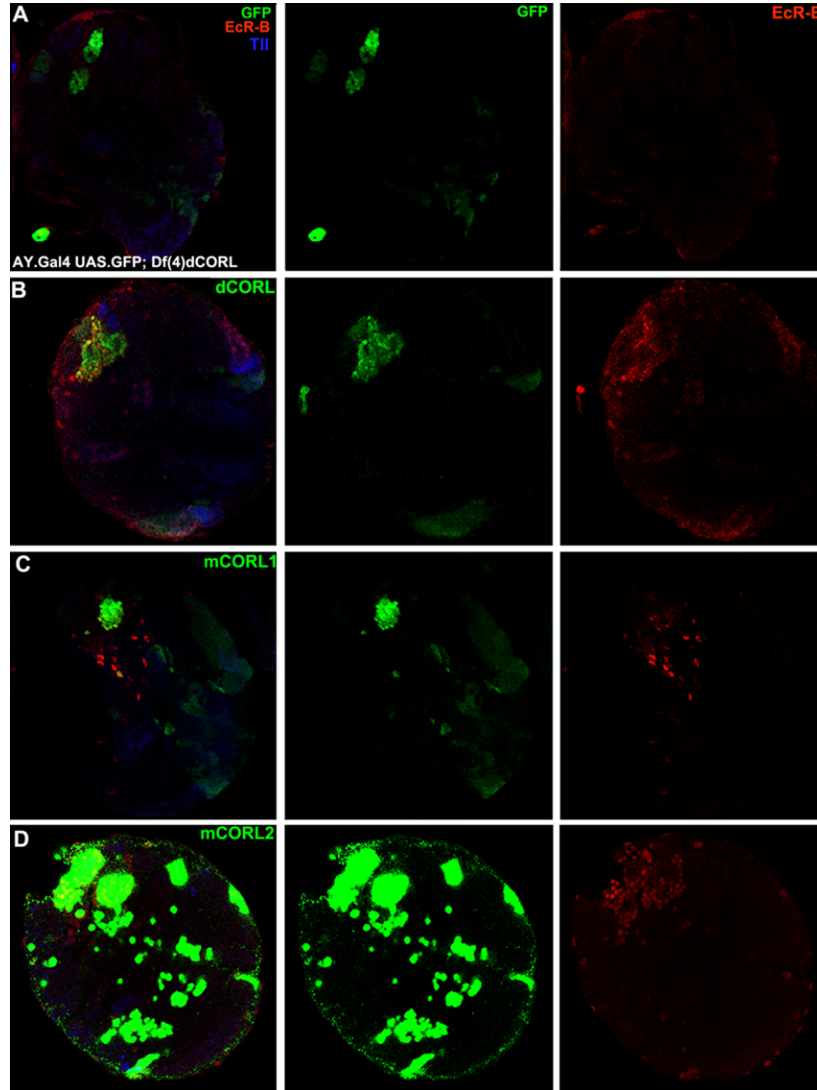

**Fig. S1. Whole brain lobe images of the rescue experiments shown in Fig. 3.** Single slice images of the brain lobes containing the clones shown in Fig. 3. A) A lobe with a clone in the MB expressing AY.Gal4 UAS.GFP on II. EcR-B1 expression remains absent and is not rescued. B) A lobe with a clone in the MB expressing AY.Gal4 UAS.GFP on II and UAS.dCORL on III. EcR-B1 expression is rescued in the clone. C) A lobe with a clone in the MB expressing AY.Gal4 UAS.GFP on II and. UAS.mCORL1 on III. EcR-B1 expression in the clone is faint and a few non-specific EcR-B1 cells outside the MB region are visible. D) A lobe with two clones encompassing the entire MB expressing AY.Gal4 UAS.GFP on II and. UAS.mCORL2 on III. EcR-B1 expression is rescued, a phenocopy of dCORL.

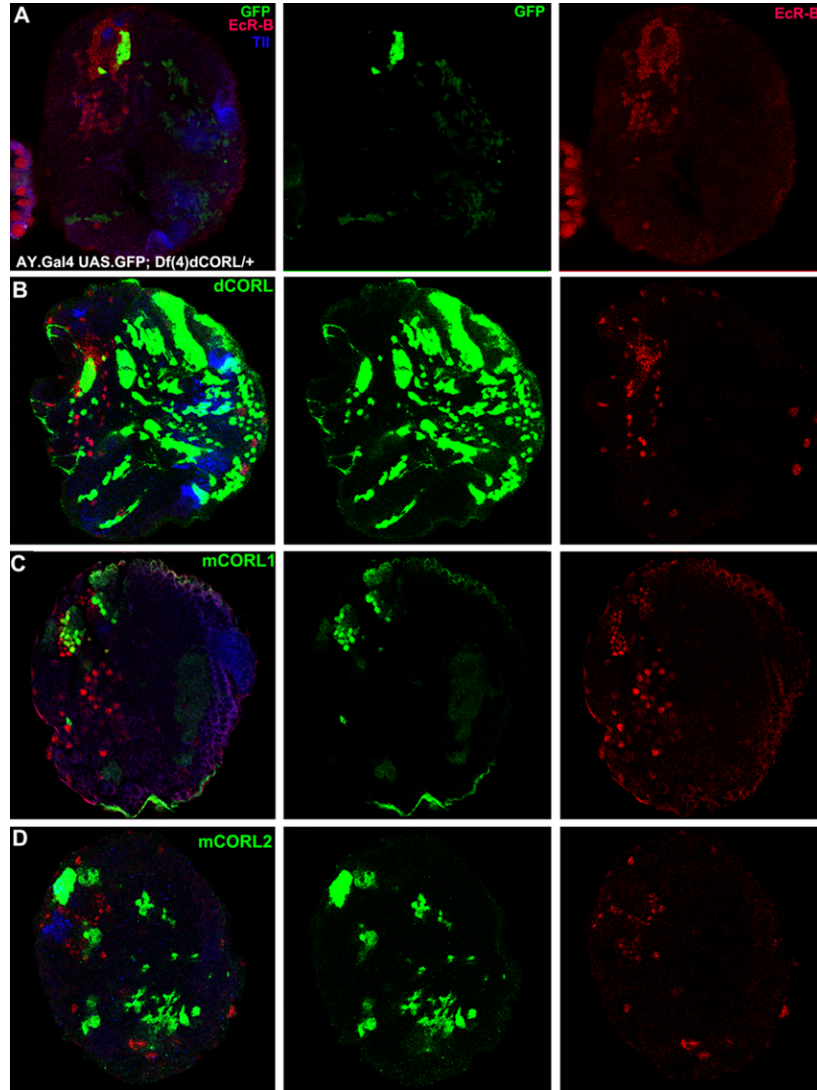

**Fig. S2. Whole brain lobe images of the overexpression experiments shown in Fig. 4.** Single slice images of the brain lobes containing the clones shown in Fig. 4. A) A lobe with a clone in the MB expressing AY.Gal4 UAS.GFP on II. EcR-B1 is unaffected. B) A lobe with a clone in the MB expressing AY.Gal4 UAS.GFP on II and UAS.dCORL on III. EcR-B1 expression is repressed in the clone. C) A lobe with a clone in the MB region expressing AY.Gal4 UAS.GFP on II and UAS.mCORL on III. Where EcR-B1 expression overlaps the clone it is unaffected. D) A lobe with a clone in the MB expressing AY.Gal4 UAS.GFP on II and UAS.mCORL on III. EcR-B1 expression is repressed in the clone, a phenocopy of dCORL.
